## CORRECTION

# Correction: Dynamic movements facilitate extreme gap crossing in flying snakes

Mal Graham and John J. Socha

There was an error in *J. Exp. Biol.* (2021) **224**, jeb242923 (doi:10.1242/jeb.242923).

Two values in Table 1 are incorrect; the original and corrected versions are shown below (with corrected values highlighted). Both the online full text and PDF versions of the paper have been corrected. The authors apologise to the readers for this error, which does not impact the results or conclusions of the paper.

**Table 1 (corrected). Landing head speed comparisons between non-cantilever and cantilever crossing events, at the five gaps sizes for which both behavior types were performed**

| Gap size (% SVL) | Average cantilever landing speed (SVL s <sup>-1</sup> ) (N) | Average non-cantilever landing speed (SVL s <sup>-1</sup> ) (N) |
|------------------|-------------------------------------------------------------|-----------------------------------------------------------------|
| 35               | 0.275 (13)                                                  | 1.73 (1)                                                        |
| 40               | 0.195 (14)                                                  | 0.531 (2)                                                       |
| 45               | 0.249 (11)                                                  | 0.398 (7)                                                       |
| 50               | 0.225 (4)                                                   | 0.893 (12)                                                      |
| 55               | 0.359 (2)                                                   | 1.23 (15)                                                       |

N, number of trials.

**Table 1 (original). Landing head speed comparisons between non-cantilever and cantilever crossing events, at the five gaps sizes for which both behavior types were performed**

| Gap size (% SVL) | Average cantilever landing speed (SVL s <sup>-1</sup> ) (N) | Average non-cantilever landing speed (SVL s <sup>-1</sup> ) (N) |
|------------------|-------------------------------------------------------------|-----------------------------------------------------------------|
| 35               | 0.320 (13)                                                  | 1.73 (1)                                                        |
| 40               | 0.195 (14)                                                  | 0.531 (2)                                                       |
| 45               | 0.249 (11)                                                  | 0.398 (7)                                                       |
| 50               | 0.225 (4)                                                   | 0.893 (12)                                                      |
| 55               | 0.359 (2)                                                   | 1.25 (15)                                                       |

N, number of trials.
